# Supplementary material
Source: publisher site journal article supplement (https://www.spandidos-publications.com/4894/downloadSupplementary)

Figure S1. Sequence used to overexpress Raf kinase inhibitor protein via the lentiviral transduction.

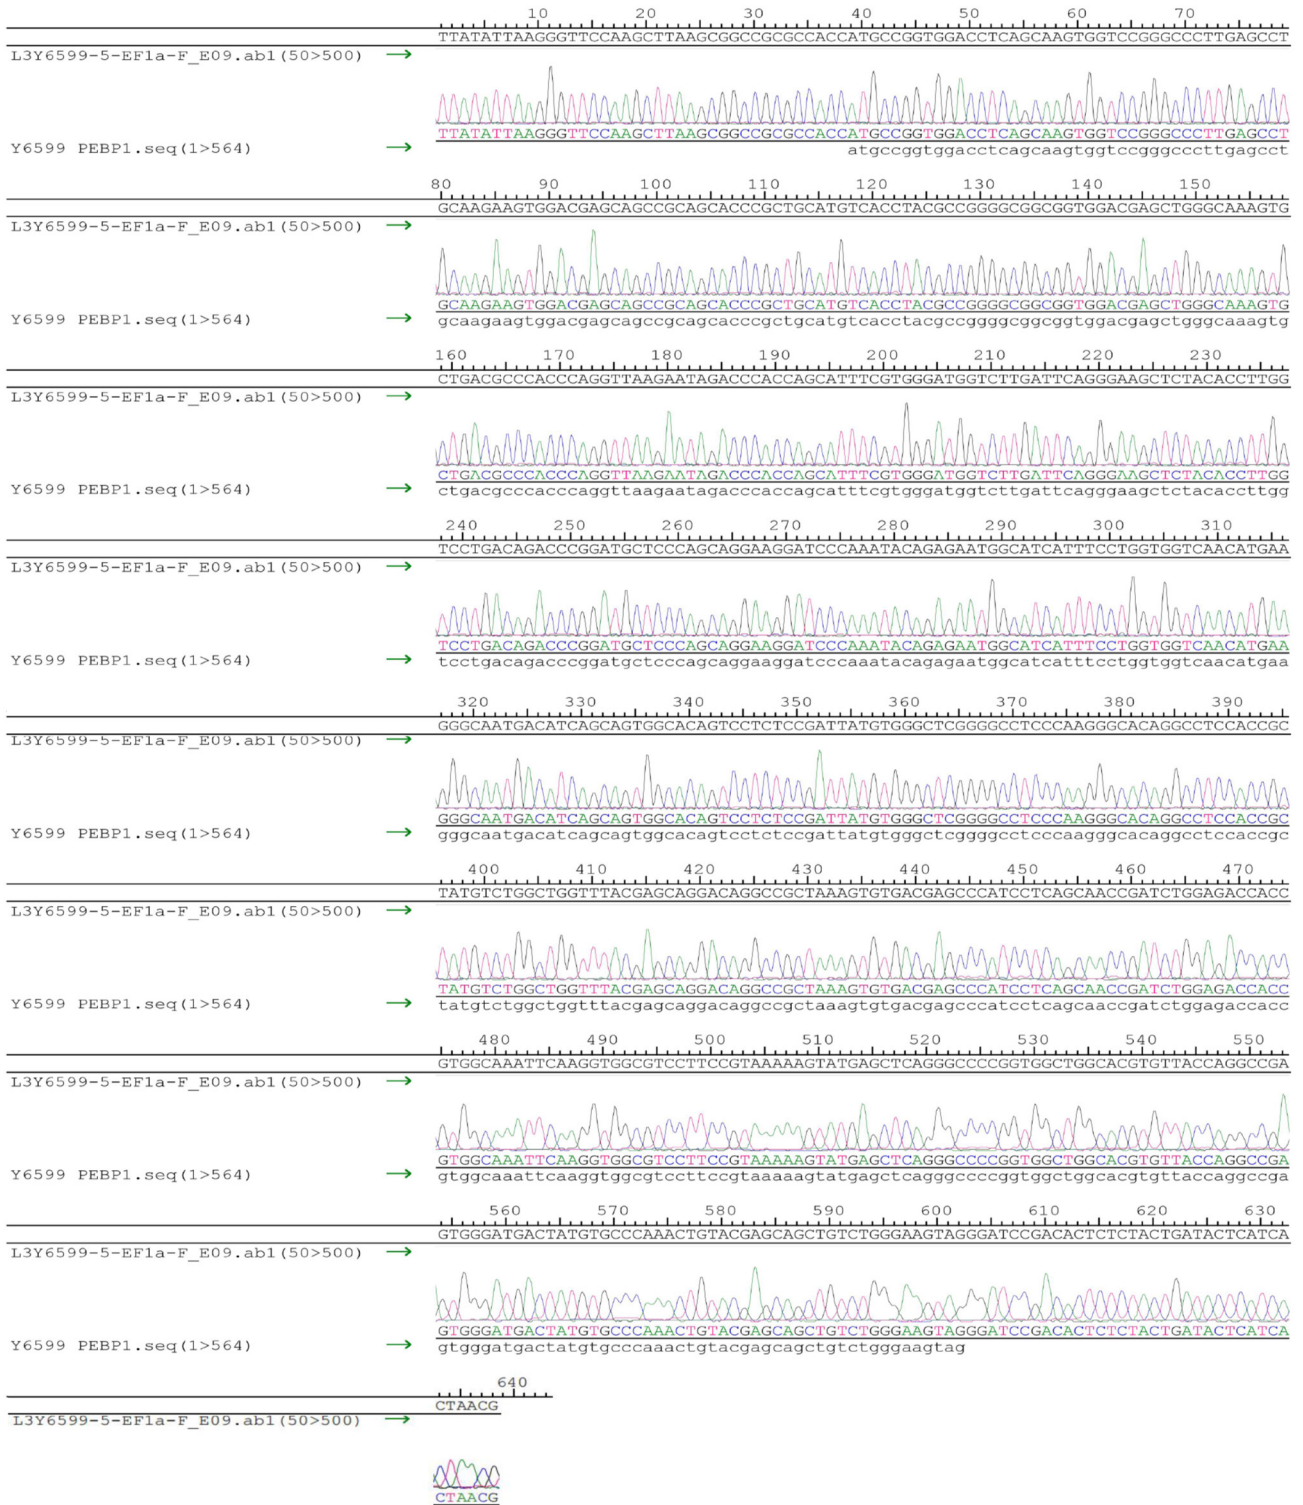

Figure S2. Shuttle plasmid used in lentiviral transduction.

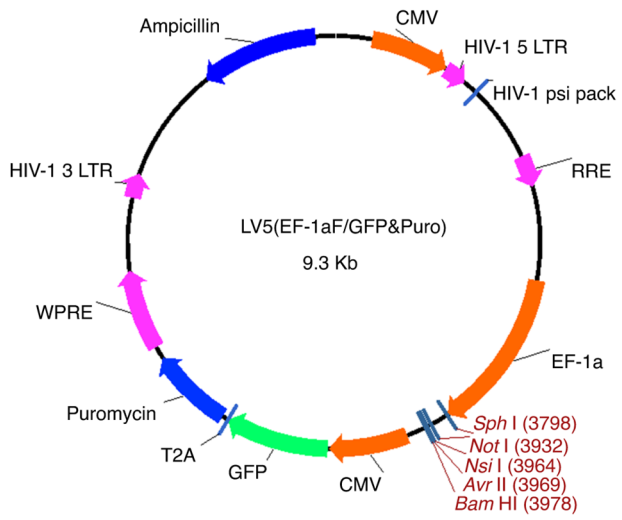

Supplement: Supplementary file 1 [file downloadSupplementary]
